# Supplementary material for: Narrative analysis of the life experience of a child of a commercial sex worker
Source: Research Square preprint supplement (doi:10.21203/rs.3.rs-6576970/v1), 2025-07-11
Supplement: Supplementary file 1 [file 5de68877f7f0efe6c8c05583.pdf]

| Segment ID | Labov Element       | Narrative Excerpt                                                                                                  | Thematic Code(s)             | Notes                                                                                  |
|------------|---------------------|--------------------------------------------------------------------------------------------------------------------|------------------------------|----------------------------------------------------------------------------------------|
| 1          | Abstract            | I live in a hostel with my friend... I don't know how it is to have a father or siblings.                          | Orphanhood, Identity         | Summarizes narrator's current status and emotional core                                |
| 2          | Orientation         | My mother died. She committed suicide... I used to go there until a few years ago, but I have stopped going there. | Loss, Rescue, Caregiver Role | Sets background, introduces setting and key characters (nun, brothel madam, neighbour) |
| 3          | Orientation         | The madam in the brothel always shouts at me... because she incurred a loss...                                     | Discrimination, Stigma       | Brothel dynamics and power imbalance                                                   |
| 4          | Orientation         | One day my neighbour... told me that shopkeeper isn't a good guy and the reason for my mother's death              | Discovery, Trauma Trigger    | Builds context to life-changing event                                                  |
| 5          | Complicating Action | She beat my mother... My mother hanged herself on the same day...                                                  | Violence, Suicide            | Climax event; marks a transformation point                                             |
| 6          | Complicating Action | Ever since I heard about the cause... I don't feel like going to the brothel.                                      | Disgust, Separation          | Emotional distancing from traumatic location                                           |
| 7          | Complicating Action | I hate the area and people living there. Everyone is always quarrelling                                            | Stigma, Community Breakdown  | Negative attitude toward brothel environment                                           |

|    |                        |                                                                                                    |                                      |                                                                    |
|----|------------------------|----------------------------------------------------------------------------------------------------|--------------------------------------|--------------------------------------------------------------------|
| 8  | Complicating<br>Action | My mother did not want to stay<br>in the brothel                                                   | Parental<br>Model,<br>Powerlessness  | Establishes mother as<br>moral influence                           |
| 9  | Evaluation             | I surely miss having someone<br>by my side whom I can call<br>mine                                 | Loneliness,<br>Emotional<br>Need     | Deep emotional reflection                                          |
| 10 | Evaluation             | Society looks at me<br>differently... my friends still<br>live in the area.                        | Public<br>Stigma,<br>Exclusion       | Internalization of social<br>judgment                              |
| 11 | Resolution             | I would prefer calling myself<br>an orphan... decent living<br>where people respect each<br>other. | Identity<br>Reconstructio<br>n, Hope | Attempts to build new<br>self-image                                |
| 12 | Coda                   | Technically, I no longer belong<br>to the area. I don't have anyone<br>there.                      | Disassociation<br>, Closure          | Final statement of self-<br>separation and social<br>repositioning |
