# Supplementary material for: Narrative analysis of the life experience of a child of a commercial sex worker
Source: Research Square preprint supplement (doi:10.21203/rs.3.rs-6576970/v1), 2025-07-11
Supplement: Supplementary file 2 [file f43996e2709b5a45b56f8dbb.pdf]

## **CODEBOOK FOR NARRATIVE ANALYSIS**

### **Labov Elements:**

- Abstract: Summary of the story.
- Orientation: Background context including characters and setting.
- Complicating Action: Main events and turning points.
- Evaluation: Reflections and emotional responses.
- Resolution: Conclusion or solution to the issue.
- Coda: Bridge back to the present; closing commentary.

### **Thematic Code Definitions:**

- Orphanhood: Experience of growing up without parents or guardians.
- Identity: Self-perception and distancing from stigmatized identities.
- Stigma: Societal judgment or exclusion.
- Loss: Emotional consequences of losing a caregiver.
- Disgust/Disassociation: Emotional withdrawal from people or places.
- Parental Model: Influence of caregiver's beliefs and life.
- Emotional Need: Longing for attachment and support.
- Violence: Exposure to physical aggression.
- Hope/Resolution: Vision for a better future and new self-image.

### **Authorship and Integrity Note**

#### **Authorship and Integrity Note:**

This codebook was developed by the author based on original qualitative analysis of a single-participant narrative. The coding framework is grounded in Labov's (1972) model of personal narrative, and thematic codes were derived manually by the researcher through close

reading and interpretation of the participant's story. No automated or external pre-existing coding templates were used. This document is intended for supplementary use in academic publication and reflects the author's independent scholarly work.

Reference:

Labov, W. (1972). *Language in the Inner City: Studies in the Black English Vernacular*.  
University of Pennsylvania Press.
